# Supplementary material for: Variability of manometric sea level from reanalyses and observation-based products over the Arctic and North Atlantic Oceans and the Mediterranean Sea
Source: Copernicus journal article supplement (doi:10.5194/sp-2023-28), 2023-08-29
Supplement: Supplementary file [file sp-2023-28-AC2-supplement.pdf]

SP-2023-28 Submitted on 02 Aug 2023

*“Variability of manometric sea level from reanalyses and observation-based products over the Arctic and North Atlantic Oceans and the Mediterranean Sea” by*

*Andrea Storto, Giulia Chierici, Julia Pfeffer, Anne Barnoud, Romain Bourdalle-Badie, Alejandro Blazquez, Davide Cavaliere, Benjamin Coupry, Marie Drevillon, Sebastien Fourest, Gilles Larnicol, and Chunxue Yang*

*Report: 8th edition of the Copernicus Ocean State Report (OSR8)*

## Reply to Reviewer 2

We thank the reviewer for the careful reading, the encouraging comments, and the many suggestions to improve the quality of the manuscript. We report below a point-by-point answer to the Reviewer’s comments (Reviewer in bold font, our reply in regular font). Additionally, please note the limits in terms of the number of words and the number of figures for this type of submission, which we already exceeded in the original version; therefore we cannot add new figures/text but only improve/change/rearrange the original manuscript.

Finally, the GRACE dataset went through reprocessing, and we have replaced the previous dataset with the most recent one, which shows some non-negligible changes in the North Atlantic and Arctic regions.

## Comments

**I have serious concerns on the calculations over the Arctic Ocean from the SLB method (primarily from the Argo data), with slightly lesser concerns about the North Atlantic study.**

**How do the authors calculate steric anomalies in the Arctic when there are only small numbers of floats in this region???? As someone who is currently working on analyzing individual Argo float data for a project and not just using analyzed grids, I can assure the authors that there are not sufficient observations in the Arctic to even begin to do the calculations they are attempting. Most of the analysis grids cut-off the data at 65° because of this. If there are "values" in the grid cells, they must be from a climatology or VERY limited data and extrapolation. Unless the authors can justify that there are sufficient Argo observations in the Arctic to support their calculations, I cannot accept that any calculation of ocean mass based on altimetry - Argo data is credible in the Arctic Ocean.**

We thank the reviewer for this comment; indeed, the Arctic region is affected by large uncertainties for the SLB product, due to the poor observational sampling. Our approach for the revised version is, however, to i) explicitly mention these limitations for the SLB product (the other two being less affected, as reanalysis bears information on the meridional transports and atmospheric forcing, and GRACE is not necessarily affected besides issues with satellite footprint geometry and leakage); ii) discuss in more details the uncertainty of the products and compare it between the products, as also suggested by Reviewer 1. Please note, that the focus here is not to show only the SLB product but to discuss the advantages and disadvantages of the three datasets on the study basins. That is why we do not want to exclude SLB in the Arctic, but better mention and quantify its limitations at high latitudes.

**There may be some validity in the using the ocean state estimate, but this is also limited by the altimetry data problems over the Arctic due to inclinations of the satellites, sea ice, etc. In the manuscript between lines 185-195, the authors point out that the trend in ocean mass using the GREP method (the ocean reanalysis steric correction) is 6.2 mm/year, compared to 2.5 mm/year for the gravimetry (or only a little over the global mean rate). They comment later: "Note that the GRACE-derived trend is likely too large, as it exceeds the altimetry-based total sea level trend of 2.9 mm yr<sup>-1</sup>, although the latter is characterized by significant under-sampling at high latitudes and ice-covered regions". I have to assume this later statement is referring to the GREP estimate, not GRACE. And if it is 6.2 mm/year, that means an enormous negative steric change over the Arctic ( $3 \text{ mm} - \text{steric} = 6.2$ , means  $\text{steric} = -3.2 \text{ mm/year}$ . This would have to be caused by either a cooling or salt gain, which doesn't really make physical sense based on observations of the Arctic warming and freshening. This does not encourage one to trust either the GREP or the ARGO-based SLB estimate, and I suspect for the same reasons -- there simply are not enough T/S measurements there to support the calculation. IMO, the entire Arctic analysis should be stricken because the data sets being used are not adequate to measure what the authors want. If they want to include it, they need to do a much better job of describing the limitations of the various data and models in the Arctic.**

Please see above for the issue of the Arctic Ocean data reliability. We will make this point much more clear in the revised version, but we still believe there is value in assessing and comparing the manometric sea level in the Arctic, eventually pointing to the weaknesses (these datasets are however state-of-the-science datasets that are broadly used also for Arctic studies, regardless of the observational undersampling).

Additionally, it is important to note here that we do not expect the budget to close at the regional scale and that large errors may affect any of the components of the budget at the regional scale (altimetry, grace, and Argo), especially over the Arctic where there are known issues with sampling both for the in-situ and altimetry datasets. The new version of the GRACE dataset over the Arctic shows a trend that will likely be less than 2.5 mm/yr (we still need to redo the computation with the same definition as in the manuscript).

The reviewer is of course correct, that we confused GRACE with GREP in the discussion. We will add all these points in the revised version of the manuscript.

**The analysis in the North Atlantic and Med. Sea is better, because the data can support this, but I am troubled by the fact the authors did not use the salinity data in the Argo-based method. They do this because of a small residual drop post 2016 that appears in global halosteric sea level variations. While this is a legitimate concern for global studies, it is not for regional studies. There can be large, real halosteric (salinity) fluctuations that are balanced by a compensating temperature change. This is known as "density compensation" and is a common feature in T/S data where water masses are being mixed, there are large fronts, eddies, and deep convection -- all common features of the North Atlantic. I can assure you that if you look at the T/S grids (or profiles) you will see these features all over the Atlantic and Med. Sea and that they can be quite large -- tens of cm of halosteric/thermosteric sea level change, that when added cancel so the steric change is small. Such an event happened in the late 70s called the "Great salinity Anomaly" and based on what I have been observing in the Argo profiles, something similar has been happening over the last several years. I haven't seen any**

**papers on it yet, but my point is that the authors should NOT exclude salinity from their calculations on regional estimates. Yes, there may a small global drift, but by ignoring salinity they are eliminating signals that are tens of cm that will cancel some of the thermometric variations. These will not necessarily average to zero. I suggest the authors recompute their Argo-based SLB estimate including salinity, and just note that the trend may be a little off at the end of the record because of the apparent salinity drift.**

Please note, that there has been a misunderstanding here, as probably the text in the original manuscript was not clear enough. Indeed, we only neglect the halosteric contribution for the calculation of the global mean (i.e. the barystatic). In all regional time series - on which the manuscript is based - we do consider the full steric signal, including both the thermosteric and halosteric components, for the SLB product. Therefore, we thank the reviewer for his extensive comments, and we are sorry for the misunderstanding, but these do not apply to the data used in the manuscript. In the revised version of the manuscript, we have now stressed that the manometric estimate based on the SLB method is calculated as the difference between the total sea level changes from altimetry and the full steric changes from Argo, including the halosteric variations.

**My final major concern is on the analysis of the relationship with various climate indices. This section is so short, that I cannot fully understand how the relationships were established or if the climate indices were smoothed in any way. For instance, the NAO has a lot of short-term (month-month) variability, while the AMO has a large 60-year oscillation which will correlate with the trend over a twenty year period. That's not really good evidence of a relationship. But not knowing exactly what was done, and how the percentages were computed, I cannot judge this. Unless the authors choose to expand this with a more thorough description of the analysis, I cannot support it being included.**

In the revised version we will add some details on the calculation and add some discussions on the climate modes, although the length of the paper is very limiting. Data used for these calculations are monthly raw means without any low-pass filtering, similar to many other works focussing on the climate mode fingerprints on sea level. We have followed this strategy without arbitrarily filtering the data, in the multivariate regression framework.

**There are some more minor comments, all of which should be easy to fix:**

**1. On the discussion of the Boussinesq approximation: authors should add “cannot represent the steric expansion...” They can (and do) measure the non-global parts quite well.**

Thanks for this point, we include it in the revised version to stress that only the global steric signal.

**2. It is true that reanalysis models “make barystatic and manometric terms often unrealistic” is true. But in most cases they are also non-existent! This should be added.**

This point is not clear. All reanalysis models are forced by atmospheric reanalyses, and the freshwater cycle implied by this forcing is not balanced, meaning that the barostatic and manometric terms are not realistic by construction (but existent). Maybe we missed the reviewer's point; therefore, we prefer to leave the manuscript unchanged.

**3. There are some state estimates that have begun to assimilate gravimetry and do have reasonable barostatic variations: ECCO\_v4r4 is one. Rui Ponte recently used it for diagnosing the freshening of the ocean in a paper in GRL.**

We will add the correct reference for ECCO to show reasonable barostatic variations.

**4. "A linear trend of  $0.12 \pm 0.03$  mm yr<sup>-1</sup> is added to consider the contribution of the deep ocean to thermosteric sea level changes (Chang et al., 2019)." This is a value for the global average, and appropriate only for GLOBAL steric estimates. This is driven primarily by deep warming in the Southern Ocean, with lesser signals in the North Atlantic and NO evidence (or data) for such a trend in the Arctic. Please remove this "correction" for these data and merely comment on the potential of deep warming signals that are not accounted for and give some ranges -- and not just a global value! In fact, the authors should be able to analyze this somewhat with their ocean reanalysis output. What does it say?**

We will remove the deep ocean correction in the revised version of the manuscript and acknowledge the fact that steric signals from the deep ocean are not accounted for. However, we are not able to give an order of magnitude for the potential effects of the deep ocean warming at the regional scale. There is currently not enough data to do so. Ocean reanalyses are poorly constrained as well in the deep ocean. Any range of values given for the steric contribution of the deep ocean at the basin scale would be affected by large uncertainties.

**5. "Explained variance, as percent R<sup>2</sup> coefficient, is used to quantify how much of the regional signal is explained by the global barostatic signal due to fast barotropic motion." R<sup>2</sup> (based on squaring the correlation) is NOT explained variance unless the data being compared have exactly the same variance. In this case, they likely do not. Better to compare variances:  $PVE = 1 - \text{var}(\text{resid})/\text{var}(\text{orig})$ , where resid is the original time series minus the global barostatic signal. This is really variance explained.**

Thanks, we will correct the reference to the explained variance versus R<sup>2</sup> coefficient as suggested by the Reviewer (in both the methods and results sections).
